1 **A rapid, super-selective method for detection of single nucleotide**  
2 **variants in *C. elegans***

3  
4 Denis Touroutine and Jessica E. Tanis

5  
6  
7 Department of Biological Sciences

8 University of Delaware

9 Newark, DE 19716

10  
11  
12  
13  
14  
15  
16  
17  
18  
19  
20  
21  
22  
23  
24  
25  
26  
27  
28

29 **Abbreviated Title:** SuperSelective genotyping

30 **Key words:** *C. elegans*, genotyping, single nucleotide variant, SuperSelective PCR,

31 ARMS PCR

32

33 Correspondence should be addressed to:

34 Dr. Jessica Tanis

35 Department of Biological Sciences

36 University of Delaware

37 105 The Green

38 233 Wolf Hall

39 Newark, DE 19716

40 E-mail: [jtanis@udel.edu](mailto:jtanis@udel.edu)

41

42

43

44

45

46

47

48

49

50

51

52

53

54

55

56

57

58

59

60

61 **ABSTRACT**

62 With the widespread use of single nucleotide variants generated through mutagenesis  
63 screens, the million mutation project, and genome editing technologies, there is  
64 pressing need for an efficient and low-cost strategy to genotype single nucleotide  
65 substitutions. We have developed a rapid and inexpensive method for detection of point  
66 mutants through optimization of SuperSelective (SS) primers for end point PCR in  
67 *Caenorhabditis elegans*. Each SS primer consists of a 5' "anchor" that hybridizes to the  
68 template, followed by a non-complementary "bridge," and a "foot" corresponding to the  
69 target allele. The foot sequence is short, such that a single mismatch at the terminal 3'  
70 nucleotide destabilizes primer binding and prevents extension, enabling discrimination  
71 of different alleles. We explored how length, stability, and sequence composition of  
72 each SS primer segment affected selectivity and efficiency in order to develop simple  
73 rules for primer design that allow for distinction between any mismatches in various  
74 genetic contexts over a broad range of annealing temperatures. Manipulating bridge  
75 length affects amplification efficiency, while modifying the foot sequence can increase  
76 discriminatory power. Flexibility in the positioning of the anchor enables SS primers to  
77 be used for genotyping in regions with sequences that are challenging for standard  
78 primer design. In summary, we have demonstrated flexibility in design of SS primers  
79 and their utility for genotyping in *C. elegans*. Since SS primers reliably detect single  
80 nucleotide variants, we propose that this method could have broad application for SNP  
81 mapping, screening of CRISPR mutants, and colony PCR to identify successful site-  
82 directed mutagenesis constructs.

83

84

## 85 INTRODUCTION

86 In this genomic era, researchers have identified a multitude of single base pair  
87 substitutions, the most common type of DNA sequence variation in genome sequence  
88 data. Naturally occurring single nucleotide polymorphisms have been linked to human  
89 disease (Shastry 2002; Suh and Vijg 2005) and are used for gene mapping (Davis *et al.*  
90 2005; Altshuler *et al.* 2008) and evolutionary studies (Koch *et al.* 2000). In genetic  
91 model systems, point mutants isolated through mutagenesis screens and gene editing  
92 are essential tools for discovery of gene function. Therefore, researchers working  
93 across a wide range of disciplines and systems can greatly benefit from having a low  
94 cost, robust, and efficient method to distinguish between alleles with single nucleotide  
95 variations.

96 In *C. elegans*, many mutants have been generated in forward genetic screens,  
97 with the most commonly used chemical mutagen ethyl methanesulfonate (EMS)  
98 exhibiting a mutagenesis bias towards transition mutations (Brenner 1974; Flibotte *et al.*  
99 2010). Over 800,000 single nucleotide substitutions (SNSs) have been identified in the  
100 million mutation project, carried out to provide the *C. elegans* research community with  
101 a resource of mutant alleles for all genes in the genome (Thompson *et al.* 2013). SNSs  
102 are now also induced by CRISPR gene editing to interrogate the function of specific  
103 amino acids (Dickinson and Goldstein 2016). To analyze the phenotype associated with  
104 a mutation and decipher gene function, genetic crosses are performed, necessitating a  
105 reliable, rapid method for routine genotyping of SNSs.

106 A variety of techniques for SNS genotyping are available, however, these  
107 methods are either labor intensive, expensive, or require extensive troubleshooting  
108 (Mamotte 2006). Cleaved Amplified Polymorphic Sequence (CAPS) genotyping is  
109 based on the formation or disruption of a restriction enzyme recognition site by a  
110 mutation and involves enzymatic digestion of DNA amplified from the target region  
111 followed by electrophoresis (Konieczny and Ausubel 1993). A modified method, dCAPS,  
112 can be used to create or remove a restriction enzyme site to distinguish between two  
113 alleles (Neff *et al.* 2002). While the CAPS method is simple, it involves extra steps  
114 beyond PCR, requires purchase of the different restriction enzymes, and can lead to  
115 ambiguous results in cases of incomplete enzyme digestion. Other genotyping methods,  
116 including the TaqMan assay and melting curve analysis of FRET probes, are not labor  
117 intensive, but do require acquisition of allele-specific hybridization probes labeled with  
118 different fluorescent dyes as well as access to expensive instrumentation to allow for  
119 real time monitoring of PCR amplification (Bernard *et al.* 1998; Livak 1999).

120 Allele-specific PCR, also known as Amplified Refractory Mutation System  
121 (ARMS) PCR, and the modified method Simple Allele-discriminating PCR (SAP) are  
122 inexpensive genotyping methods which utilize allele-specific oligonucleotide primers  
123 (Newton *et al.* 1989; Little 2001; Bui and Liu 2009; Medrano and De Oliveira 2014).  
124 Discrimination between wild-type and mutant alleles is based on a mismatch at the 3'  
125 terminal base which prevents extension of the primer (Petruska *et al.* 1988; Newton *et*  
126 *al.* 1989; Wu *et al.* 1989; Huang *et al.* 1992). However, ARMS and SAP often require  
127 extensive troubleshooting as PCR specificity must be controlled by stringent reaction

128 conditions. Further, a lack of flexibility in primer placement can make SNS detection  
129 difficult in some genetic contexts (Medrano and De Oliveira 2014).

130 To detect the presence of rare single nucleotide polymorphisms in DNA  
131 fragments found in blood samples, Vargas et al. (2016) developed SuperSelective (SS)  
132 primers for real-time PCR assays. A SS primer consists of a 5' anchor sequence that  
133 hybridizes to the template DNA followed by a non-complementary bridge sequence and  
134 a short 3' foot sequence that is complementary to the target allele sequence (Vargas *et*  
135 *al.* 2016). Our goal was to design and optimize allele-specific primers for end point PCR  
136 genotyping based on the principle of SS primers. We have probed the different regions  
137 of the primer to determine how specificity is achieved and developed simple rules for SS  
138 primer design. Our work presents SuperSelective genotyping as an advantageous  
139 alternative to existing genotyping methods that will facilitate research with genetic  
140 systems.

141

## 142 **MATERIALS AND METHODS**

143 **Nematode Culture:** *C. elegans* were maintained on Nematode Growth Media (NGM)  
144 plates with OP50 *E. coli* as a food source using standard techniques. The wild-type  
145 strain was Bristol N2. Strains and alleles used in this study were as follows: PT443 *klp-*  
146 *6(sy511)* III; *him-5(e1490)* V; DM1017 *plx-2(gk2864)* II, *C05B5.11(gk2895)* III; VC40549  
147 *cil-7(gk688330)* I; ZZ12 *lev-11(x12)* I; CB1372 *daf-7(e1372)* III; DA465 *eat-2(ad465)* II.  
148 All strains were maintained at 20°C except CB1372 which was grown at 15°C.

149

150 **Molecular biology:** Primers were designed as described in the results section and  
151 obtained from Integrated DNA Technologies (IDT). A complete list of primers used is in  
152 Supplementary Table 1. Genomic DNA (gDNA) was isolated with the Gentra Puregene  
153 Tissue Kit (Qiagen Cat. No. 158667) following the manufacturer's instructions. Crude  
154 genomic DNA was extracted by incubating worms in lysis buffer (50 mM KCl, 10mM Tris  
155 pH 8.3, 2.5 mM MgCl<sub>2</sub>, 0.45% NP-40, 0.45% Tween-20 and 1 mg/ml of Proteinase K)  
156 for 1 hour at 65°C followed by 95°C for 25 minutes and used where indicated. PCR was  
157 performed in 15 µl reactions using 2x GoTaq DNA Polymerase master mix (Promega  
158 Cat. No. M3008) with 5 ng of gDNA and 500 nM of each primer. The following protocol  
159 was performed: 98°C for 30 seconds (cycle one only), 98°C for 10 seconds, annealing  
160 temperature (gradient) for 15 seconds, and 72°C for 30 seconds for 30 cycles.  
161 Annealing temperatures for the anchor of SS primers were determined using the New  
162 England Biolabs T<sub>m</sub> calculator and are indicated in Supplementary Table 1. Gradient  
163 temperatures were across 10°C; T<sub>m</sub> minus 5°C (lowest temperature) to T<sub>m</sub> plus 5°C  
164 (highest temperature). PCR products were resolved on 1% agarose gels and visualized  
165 with SYBR safe (Thermo Fisher Cat. No. S33101). All gradient PCR experiments were  
166 performed at least twice; representative images displayed in the figures.

167

168 **Data availability:** All data and methods required to confirm the conclusions of this work  
169 are within the article, figures, and table.

170

## 171 **RESULTS**

172 **Limitations of ARMS PCR for *C. elegans* genotyping:**

173 We have been performing genetic crosses with point mutants that do not cause visible  
174 phenotypes or change restriction sites for multiple ongoing projects. To discriminate  
175 between wild-type and mutant alleles we sought to use the ARMS PCR genotyping  
176 strategy, which is based on the principle that a mismatch at the 3' terminal base of a  
177 primer results in inefficient amplification (Petruska *et al.* 1988; Wu *et al.* 1989; Huang *et*  
178 *al.* 1992) as the absence of exonuclease activity in Taq DNA polymerase prevents  
179 primer-template mismatch repair (Tindall and Kunkel 1988). We designed two allele-  
180 specific forward primers that hybridized to the variant base in either the wild-type or  
181 mutant template. Each allele-specific primer was paired with a common reverse primer  
182 and gradient PCR reactions were performed to determine the optimal temperature for  
183 discriminatory power. As most existing *C. elegans* mutations are transitions due to EMS  
184 mutagenesis bias (Flibotte *et al.* 2010), we first focused on differentiating between  
185 guanine (G) to adenine (A) SNSs. While all primers designed to distinguish between G  
186 to A transitions had similar melting temperatures, we found that genetic context affected  
187 specificity (Figure 1A-D). ARMS primers were able to discriminate between wild type  
188 and *him-5(e1490)* across the entire gradient (Figure 1A). However, primers designed to  
189 distinguish between wild-type and the *lev-11(x12)*, *cil-7(gk688330)*, and *klp-6(sy511)*  
190 alleles were only discriminatory at the highest annealing temperatures when identical  
191 concentrations of clean genomic DNA were used (Figure 1B-D). We also tested the  
192 capability of ARMS primers to distinguish between other variants such as thymine (T) to  
193 A in *plx-2(gk2864)* and G to T in C05B5.11(*gk2895*). While the primers that detect the  
194 *plx-2* and C05B5.11 mutant alleles were specific across the entire temperature range,



195 the wild-type detecting primers exhibited only weak selectivity at high annealing  
196 temperatures (Figure 1E,F).

197 We next determined if ARMS primers could be used for routine genotyping with  
198 DNA from crude worm lysis, which is of lower quality and contains PCR inhibitors. Using  
199 annealing temperatures optimal for specificity based on the gradient PCRs, the wild  
200 type could be distinguished from the *lev-11* and *plx-2* mutants as well as heterozygotes  
201 over a small temperature interval (Figure 2G,H). However, it was not possible to  
202 distinguish the C05B5.11 mutant from the wild type or heterozygote because at  
203 temperatures required for specificity, amplification efficiency was low (Figure 1I). These  
204 results demonstrate that the ARMS PCR genotyping method requires extensive  
205 experimentation to identify the optimal annealing temperature and cannot always be  
206 used to distinguish between alleles. Furthermore, there is no flexibility in the placement  
207 of ARMS primers, which prevents the use of this method for genotyping alleles in  
208 difficult genetic contexts.

209

### 210 **SuperSelective primers exhibit discriminatory power for PCR genotyping:**

211 We searched for an alternative genotyping method for point mutants and discovered SS  
212 primers, which had previously been used for detection of rare variants in qPCR assays  
213 (Vargas *et al.* 2016). A SS primer contains a long 5' sequence termed the "anchor"  
214 which anneals to the template and is separated from a short 3' "foot" sequence  
215 complementary to the region around the mismatch by a "bridge" which is not  
216 complementary to the template intervening sequence (Figure 2A,B). When the primer is  
217 hybridized to the template, the bridge and intervening sequence in the template form a

218 bubble that separates the anchor from the foot. The terminal 3' nucleotide in the foot,  
219 termed the “interrogating nucleotide,” distinguishes the allele variant. Because the foot  
220 is short, even one mismatch destabilizes binding and primer extension cannot occur.

221 To test if SS primers could be used for end point PCR to distinguish *lev-11(x12)*  
222 from wild type we designed two allele-discriminating forward primers, one for wild type  
223 and the other for the *lev-11* mutant following the rules described by Vagas et al. Each  
224 SS primer had an anchor with a melting temperature ( $T_m$ ) of approximately 60°C, a 14  
225 base pair (bp) bridge, and a 7 bp foot with the interrogating nucleotide located at the 3'  
226 end. As performed with the ARMS primers, we set up two sets of PCR reactions in  
227 parallel for each genomic DNA. One PCR reaction contained the wild-type primer with a  
228 common reverse primer, while the other contained the mutant allele-specific primer with  
229 the common reverse primer. We observed a dramatic increase in discriminatory ability  
230 of SS primers compared to the ARMS primers as the SS primers that detected the wild-  
231 type and *lev-11* mutant alleles were perfectly selective across a wide range of gradient  
232 temperatures (Figure 2C; compare to Figure 1B). *cil-7*, *plx-2*, and C05B5.11 mutants,  
233 which were poorly distinguished from the wild type with ARMS primers, were also  
234 successfully discerned with SS primers across all annealing temperatures (Figure 2D-  
235 F). While the SS primer used to distinguish the wild type from the *klp-6* mutant allele did  
236 not exhibit complete specificity (Figure 2G), there was significant improvement  
237 compared to the ARMS primer (Figure 1D). These results show that SS primers can be  
238 used to detect SNSs in different genetic contexts over a broad range of annealing  
239 temperatures.

240 Taq polymerase exhibits less efficient amplification when primers contain an A or  
241 T on the 3' end instead of a G or cytosine (C). Since Vargas et al. found that positioning  
242 the interrogating nucleotide at the penultimate position did not affect specificity, we  
243 added a C, complementary to the template, to the 3' end of the *klp-6* and *lev-11* mutant  
244 primers, which have an A and T at the interrogating nucleotide, respectively. While this  
245 did increase amplification efficiency, it reduced discriminatory power (Figure 2G,H).  
246 Thus, to distinguish between wild type and a transition mutant, the mismatch should be  
247 placed at the 3' terminal nucleotide.

248

#### 249 **Manipulating the bridge region of the SS primer increases efficiency:**

250 Having established the use of SS primers for end point PCR genotyping, we next  
251 sought to probe different regions of the primer to develop simple rules for design. All SS  
252 primers in Figure 2 contained a 14 bp bridge, with the corresponding intervening  
253 sequence also 14 bp, forming a symmetrical bubble. To determine minimum bridge  
254 length, we investigated how bubble circumference impacts SS primer efficiency and  
255 specificity. We designed additional SS primers to distinguish the wild type from the *klp-6*  
256 mutant allele, each with an anchor  $T_m$  of  $\sim 60^\circ\text{C}$  and 7 bp foot sequence, but different  
257 symmetrical bubbles. Comparison of SS primers with 6 bp, 8 bp, and 14 bp bridge  
258 sequences for both the wild-type and *klp-6* mutant alleles showed that the smallest  
259 bubble circumference resulted in the greatest amplification efficiency (Figure 3A,B).  
260 However, the wild-type SS primer containing the 6 bp bridge sequence was non-specific  
261 across all annealing temperatures (Figure 3B). SS primers with 6 bp, 8 bp, and 14 bp  
262 bridge sequences maintained specificity in distinguishing the wild-type from the *cil-7*,

263 *plx-2*, and C05B5.11 mutants, with the SS primers containing a 6 bp bridge exhibiting  
264 the greatest efficiency (Figure 3C-E). This suggests that irrespective of the 3' mismatch  
265 and genetic context, smaller bubble circumference corresponds with an increase in  
266 amplification.

267 The wild-type SS primer, which forms a G-T mismatch with the *klp-6* mutant  
268 sequence was less specific than all other SS primers tested (Figure 3B). This purine-  
269 pyrimidine mismatch has a similar geometry to G-C and A-T base pairings, causing only  
270 a weak destabilizing effect, which enables it to be extended more efficiently by Taq  
271 polymerase than any other mismatch (Huang *et al.* 1992; Rejali *et al.* 2018). To  
272 determine whether the non-specificity of the SS primer used to detect the wild-type  
273 allele at the *klp-6* locus was due to genetic context or the weak G-T primer-template  
274 mismatch, we designed SS primers with short bridge sequences to distinguish the *lev-*  
275 *11(x12)*, *daf-7(e1372)*, and *eat-2(ad465)* G to A transition mutants from wild type. SS  
276 primers with a 6 bp bridge sequence corresponding to a 6 bp template intervening  
277 sequence specifically detected the wild type allele across all annealing temperatures at  
278 the *daf-7*, but not *lev-11* and *eat-2* mutant loci. However, specificity was lost when the  
279 bridge sequence was shortened to 4 bp for all G-T primer-template mismatches (Figure  
280 4A-C). SS primers used to discriminate the wild-type allele from *plx-2(gk2864)*,  
281 C05B5.11(*gk2895*) and *lev-11(x12)*, which result in T-T, C-T and C-A primer-mutant  
282 template mismatches respectively, were specific even with a short 4 bp bridge (Figure  
283 4D-F). These results show that the minimum circumference of the bubble needed to  
284 maintain specificity depends on both primer-template mismatch and genetic context.

285

286 **The foot region of the SS primer can be manipulated to increase specificity:**

287 We next investigated how the length of the foot region impacts efficiency and specificity  
288 using SS primers that detect the wild-type allele at the *kfp-6* locus. Our original 14:14  
289 SS primer contained a 7 bp foot sequence with the interrogating nucleotide on the 3'  
290 end (Figure 2G). We discovered that shortening the foot sequence to 5 or 6 bp  
291 decreased efficiency without affecting specificity (Figure 5A). A SS primer with a 4 bp  
292 foot sequence did not produce any product (Figure 5A) even at a low 45° C annealing  
293 temperature (data not shown).

294 Since shortening the foot sequence had an undesirable effect on amplification,  
295 we sought to determine if additional mismatches in the foot sequence could be used  
296 instead to increase SS genotyping specificity. We introduced a mismatch at the  
297 penultimate position to the interrogating nucleotide, which we designate the (-1)  
298 position. Placing a G-A mismatch, which has a strong destabilizing effect (Rejali *et al.*  
299 2018), at the (-1) site prevented amplification (Supplementary Figure 1). However,  
300 introduction of a weak A-C purine-pyrimidine mismatch at the (-1) position in SS primers  
301 with 4 bp bridge sequences that previously could not distinguish wild type from *daf-7*  
302 and *eat-2* mutant alleles, resulted in specificity across all annealing temperatures  
303 (Figure 5B,C). Likewise, introduction of a purine-pyrimidine mismatch terminal to the  
304 interrogating nucleotide also generated specificity (Figure 5B,C). This suggests that  
305 placement of an additional weak destabilizing mismatch in the foot can be used to  
306 increase discriminatory power.

307

308 **SS primers enable flexibility in anchor placement:**

309 In primer design, it is important to avoid runs of one base, A/T rich domains, tandem  
310 repeats, and sequences that form secondary structure. We considered that changing  
311 the length of the template intervening sequence would allow for anchor placement  
312 flexibility. To determine how amplification is affected by an asymmetric bubble, we  
313 designed a SS primer with a 6 bp bridge to a 24 bp intervening sequence (6:24) and a 7  
314 bp foot to distinguish wild type from the *lev-11* mutant and observed specific  
315 amplification across the entire gradient (Figure 6A). However, we saw little amplification  
316 when SS primers with 6:24 and 6:30 asymmetric bubbles were used for detection of the  
317 wild-type allele at the *k1p-6* and *cil-7* loci, respectively (Figure 6B,C). Increasing foot  
318 length to 8 bp, with a C in the 3' terminal position improved efficiency of SS primers with  
319 asymmetric bubbles without affecting discriminatory power (Figure 6B,C). Since the  
320 sequence surrounding *daf-7(e1372)* is A/T rich, we created a SS primer that forms an  
321 extremely asymmetric 6:51 bubble, and this primer perfectly discriminated the wild-type  
322 from the *daf-7* mutant allele across all gradient temperatures. These results  
323 demonstrate that the anchor of SS primers can be moved to enable genotyping in  
324 difficult genetic contexts.

325

## 326 **DISCUSSION**

327 We developed a rapid, low-cost method for detection of point mutants by optimizing SS  
328 primers for end point PCR. Our analyses of seven separate genetic contexts and eight  
329 different types of mismatches show that SS primers can be used universally for  
330 genotyping over a broad range of annealing temperatures. We discovered that  
331 balancing stabilizing versus destabilizing factors in the foot region affects specificity,

332 while decreasing bridge length increases efficiency. Amplification occurs even when the  
333 SS primer bridge and intervening template sequence form an asymmetric bubble,  
334 allowing for flexibility in anchor placement. Our work demonstrates the power of SS  
335 primers for routine genotyping and we propose that this method could also be used for  
336 SNP mapping, screening of CRISPR mutants, and identification of site-directed  
337 mutagenesis clones through colony PCR.

338

### 339 **Simple instructions for SS primer design:**

340 We have defined several important factors to consider when carrying out SS  
341 genotyping. To design a SS primer, first identify a 7 base pair foot with the interrogating  
342 nucleotide in the terminal 3' position. Second, identify a 5' anchor sequence with a 50 to  
343 60% G/C content and a  $T_m$  ~60 °C at least 6 bp away from the foot. In many cases, a  
344 symmetric bubble consisting of a 6 bp bridge between the anchor and foot in the primer  
345 and corresponding non-complementary 6 bp intervening sequence in the template  
346 provides both good efficiency and specificity. However, the intervening sequence length  
347 can be increased to enable placement of the anchor in a more favorable position. Third,  
348 consider the mismatch between the primer and template at the interrogating nucleotide.  
349 A weak G/T mismatch will reduce the ability to detect between the target and non-target  
350 allele. To decrease undesired stability between the primer and non-target template, a  
351 second mismatch can be introduced either penultimate or terminal to the interrogating  
352 nucleotide. Fourth, design another SS primer to detect the other allele as well as a  
353 common reverse primer. Finally, make sure that the SS primers do not have secondary  
354 structure using the IDT OligoAnalyzer. While we have used gradient PCR to examine

355 the properties of SS primers, given that specificity is generally observed across the  
356 entire gradient, we recommend an annealing temperature of 58°C for routine  
357 genotyping. No more than 30 cycles should be used since the number of amplicons  
358 produced by the perfectly matched primer should reach plateau by this point, and if the  
359 PCR runs for additional cycles, undesired products will continue to be amplified  
360 exponentially (Saiki *et al.* 1988).

361

362 **Effect of specific primer-template mismatches on PCR specificity and efficiency:**

363 A single 3' terminal mismatch destabilizes primer-template interaction, and as *Taq* DNA  
364 polymerase does not possess 3' to 5' exonuclease activity for mismatch repair, this  
365 mismatch reduces extension efficiency, and as a result, PCR amplification, when  
366 compared with a primer perfectly complementary to the template (Petruska *et al.* 1988;  
367 Tindall and Kunkel 1988; Huang *et al.* 1992; Rejali *et al.* 2018). While this serves as the  
368 foundation for allele-specific detection with SS genotyping, PCR amplification is also  
369 influenced by the specific primer-template mismatch, with purine-purine mismatches  
370 being the most inhibitory, and purine-pyrimidine mismatches being the least inhibitory  
371 (Huang *et al.* 1992; Rejali *et al.* 2018). Ethyl methanesulfonate (EMS), the primary  
372 chemical mutagen used for forward genetic screens in *C. elegans*, exhibits a  
373 mutagenesis bias toward G/C to A/T transitions (Flibotte *et al.* 2010). When  
374 differentiating between EMS generated alleles, a G at the interrogating nucleotide of the  
375 wild-type detecting primer mismatches with a T in the mutant template. Here we found  
376 that primers with a G-T mismatch were less selective than those with T-T, C-T and C-A  
377 mismatches, consistent with the G-T mismatch being the least inhibitory (Huang *et al.*



378 1992; Rejali *et al.* 2018). As previously reported for extension rate (Huang *et al.* 1992),  
379 we observed that sequence context influenced end point PCR genotyping for weak G-T  
380 mismatches.

381 To decrease extension efficiency, and thus improve PCR specificity, an  
382 additional mismatch can be introduced either penultimate or terminal to the interrogating  
383 nucleotide (Ugozzoli and Wallace 1991; Bui and Liu 2009). Some purine-purine  
384 penultimate mismatches such as G-A inhibit extension efficiency even more than a 3'  
385 terminal G-T mismatch (Rejali *et al.* 2018). In fact, we found that a G-A mismatch at the  
386 penultimate position in the SS primer to detect the wild-type allele at the *klp-6* locus  
387 prevented amplification. Thus, if introducing an additional mismatch at the penultimate  
388 position, strong G-A, G-G, A-A, and C-C primer-template mismatches should be  
389 avoided, while weak G-T and C-A mismatches are tolerated.

390

### 391 **SS genotyping offers distinct advantages compared to other methods:**

392 Here we consider how SS primers compare with other existing allele discrimination  
393 methods. Mutations that result in creation or disruption of a restriction site can be  
394 detected by amplification of the template from the target region followed by enzymatic  
395 digestion of the DNA and electrophoresis. However, genotyping of many different alleles  
396 by this method requires a large collection of different restriction enzymes and a suitable  
397 restriction enzyme or artificial restriction site cannot be introduced at all locations. SS  
398 genotyping can be used to distinguish between mismatches in all genetic contexts and  
399 does not require any reagents or effort beyond PCR. Further, unlike single-base  
400 extension genotyping (Sauer 2000; Trewick *et al.* 2011), the 5' fluorogenic nuclease

401 Taqman assay (Livak *et al.* 1995; Callegaro *et al.* 2006), and melting curve analysis of  
402 FRET probes (Livak 1999; Combrinck *et al.* 2013), expensive equipment and  
403 specialized training are not required for design and use of SS primers for allele  
404 detection.

405         Similar to SS genotyping, ARMS PCR and the modified simple allele-  
406 discriminating PCR are inexpensive methods which utilize allele-specific oligonucleotide  
407 primers (Little 2001; Bui and Liu 2009; Medrano and De Oliveira 2014). However, when  
408 genotyping *C. elegans* point mutants, we found that ARMS PCR required extensive  
409 troubleshooting to determine optimal annealing temperature and could not always be  
410 used to distinguish between alleles at any temperature. When genotyping with crude *C.*  
411 *elegans* DNA lysates, PCR amplification can be affected by variability in lysis efficiency  
412 and DNA concentration if different numbers of worms are used. Given that stringent  
413 reaction conditions are required for allele discrimination with ARMS PCR, we remain  
414 concerned that the quality of the starting template and small fluctuations in temperature  
415 could impact genotyping results. Further, unlike SS primers, there is no flexibility in  
416 placement of ARMS and SAP primers, which makes allele detection difficult in certain  
417 genetic contexts (Medrano and De Oliveira 2014). In conclusion, SS genotyping is 1)  
418 low cost, 2) does not require special equipment, 3) works over a broad range of  
419 annealing temperatures, and 4) allows for flexibility in primer placement. SS primers can  
420 theoretically be utilized in all organisms and for any laboratory applications that require  
421 discernment between alleles.

422

## 423 **ACKNOWLEDGEMENTS**

424 We thank the *Caenorhabditis* Genetics Center (CGC) for strains and Aimee Jaramillo-  
425 Lambert and members of the Tanis lab for critical reading of the manuscript. This work  
426 was supported by a National Institutes of General Medical Sciences (NIGMS) IDeA  
427 Network of Biomedical Research Excellence (INBRE) P20 GM103446 Pilot Project  
428 grant (to J.E.T).

429

### 430 **FIGURE LEGENDS**

431 **Figure 1.** Genotyping mutants with ARMS primers. (A-F) Gradient PCR shows varying  
432 specificity of ARMS primers in distinguishing (A) *him-5(e1490)*, (B) *lev-11(x12)*, (C) *cil-*  
433 *7(gk688330)*, (D) *klp-6(sy511)*, (E) *plx-2(gk2864)* and (F) C05B5.11(*gk2895*) mutant  
434 alleles from the wild type (wt). Gradient temperatures here and throughout were across  
435 10°C;  $T_m$  minus 5°C (lowest temperature) to  $T_m$  plus 5°C (highest temperature) as  
436 shown in (A). The  $T_m$  for each primer is indicated in Supplementary Table 1. (G-I) PCR  
437 performed on crude *C. elegans* lysate from wild type (+), mutant (-), and heterozygous  
438 animals (+/-) at three temperatures optimal for specificity based on gradient PCR. The  
439 wild type can be distinguished from (G) *lev-11(x12)* and (H) *plx-2(gk2864)*, but not (I)  
440 C05B5.11(*gk2895*).

441 **Figure 2.** SS primers exhibit specificity across a broad range of annealing  
442 temperatures. (A) Each SS primer contains a 5' anchor sequence (brown), a bridge  
443 sequence (blue) not complementary to the template (black), and a 3' foot sequence  
444 (red) that is perfectly complementary for one allele, but contains a mismatch at the  
445 interrogating nucleotide (red triangle) for the other allele. The bridge and intervening

446 sequences form a bubble (grey box). (B) Four annealing schematics to illustrate SS  
447 primers used to detect wild type and *cil-7(gk688330)* in the presence of wild-type and  
448 mutant DNA. In (1) and (4) there is perfect complementarity between the primer and  
449 template. In (2) and (3) a mismatch (yellow) at the interrogating nucleotide (capital  
450 letter) results in unstable pairing between the primer and template. (C-F) SS primers  
451 with an anchor  $T_m$  of close to 60 °C, 14 bp bridge and 7 bp foot discriminate between  
452 wild type and (C) *lev-11(x12)*, (D) *cil-7(gk688330)*, (E) *plx-2(gk2864)*, and (F)  
453 C05B5.11(*gk2895*) across the entire gradient PCR. In (F), C05B5.11(*gk2895*) mutant  
454 (red arrow) and non-specific (blue arrow) amplification are indicated. (G) The SS primer  
455 to detect the wild type allele from the *klp-6(sy511)* mutant allele is not completely  
456 selective at low annealing temperatures; the *klp-6(sy511)* mutant SS primer exhibits  
457 perfect selectivity. Placement of the interrogating nucleotide at the penultimate position  
458 increases PCR efficiency, but decreases specificity of (G) *klp-6(sy511)* and (H) *lev-*  
459 *11(x12)* mutant SS primers.

460 **Figure 3.** A decrease in bubble circumference increases PCR efficiency. (A-E) Gradient  
461 PCR with SS primers to detect the (A) *klp-6(sy511)* mutant allele and wild-type alleles at  
462 the (B) *klp-6*, (C) *cil-7*, (D) *plx-2*, and (E) C05B5.11 loci. SS primers have an anchor  $T_m$   
463 of 60°C, 7 bp foot and varying bridge sequence length (6 bp, 8 bp, and 14 bp); length of  
464 intervening sequence is equal to the length of bridge sequence, creating a symmetrical  
465 bubble. Primer schematics as in Fig. 2; yellow highlight indicates mismatch.

466 **Figure 4.** Guanine-thymine primer-template mismatches are the least discriminatory.  
467 (A-C) SS primers with an anchor  $T_m$  of 60 °C, 7 bp foot, and either 4 bp or 6 bp bridge

468 sequence cannot perfectly distinguish the wild type from (A) *lev-11(x12)*, (B) *daf-*  
469 *7(e1372)*, and (C) *eat-2(ad465)* mutant alleles. The SS primer-template mismatch at the  
470 interrogating nucleotide is G-T (yellow); intervening sequence length is equal to bridge  
471 sequence length (4:4 and 6:6). (D-F) SS primers with a 4 bp bridge sequence exhibit  
472 complete specificity when interrogating nucleotide mismatch is (D) T-T in the *plx-*  
473 *2(gk2864)* mutant, (E) C-T in the C05B5.11(*gk2895*) mutant, and (F) C-A in the *lev-*  
474 *11(x12)* mutant. The SS primer to detect the wild-type from *lev-11(x12)* mutant allele in  
475 (F) anneals to the opposite strand compared to (A).

476 **Figure 5.** SS primer foot sequence and length influence specificity and efficiency. (A)  
477 Decreasing foot length from 6 bp (left) to 5 bp (middle) decreases efficiency; a 4 bp foot  
478 (right) eliminates amplification. Primers detect the wild-type allele at the *kfp-6* locus;  
479 bridge is 6 bp. (B-C) Introduction of a weak purine-pyrimidine mismatch at the  
480 penultimate (middle) or the terminal position (right) increases specificity of SS primers  
481 with a 4 bp bridge that detect the wild-type allele at the (B) *daf-7* and (C) *eat-2* loci. In  
482 primer schematics, the interrogating nucleotide is capital, mismatches highlighted in  
483 yellow.

484 **Figure 6.** Asymmetric bubble design allows for flexibility in anchor placement. (A) A SS  
485 primer with a 6 bp bridge, which forms an asymmetric bubble with a 24 bp template  
486 intervening sequence (6:24), detects the wild-type allele at the *lev-11* locus. (B,C)  
487 Asymmetric bubbles result in poor amplification (left panels); efficiency is improved by  
488 increasing the length of the foot. In (B) wild-type (blue arrow) and non-specific (red

489 arrow) amplification are indicated. (D) A SS primer which forms a 6:51 asymmetric  
490 bubble with the template detects the wild-type allele at the *daf-7* locus.

491 **Supplemental Figure 1.** Placement of the interrogating nucleotide at the penultimate  
492 position increases efficiency. Introduction of a strong purine::purine mismatch (-1) to the  
493 interrogating nucleotide prevents amplification (left), which can be restored by adding an  
494 additional complementary terminal base (middle). Placement of the interrogating  
495 nucleotide in the penultimate position in a SS primer with a short foot increases  
496 efficiency (compare to middle and right hand panels of Fig. 5A). All primers here detect  
497 the wild-type allele at the *k1p-6* locus. In the schematics, the interrogating nucleotide is  
498 in capital, all mismatches highlighted in yellow.

499

## 500 LITERATURE CITED

501 Altshuler D., M. J. Daly, and E. S. Lander, 2008 Genetic mapping in human disease.

502 Science 322: 881–888.

503 Ayyadevara S., J. J. Thaden, and R. J. Shmookler Reis, 2000 Discrimination of primer

504 3'-nucleotide mismatch by Taq DNA polymerase during polymerase chain reaction.

505 Anal. Biochem. 284: 11–18.

506 Bernard P. S., M. J. Lay, and C. T. Wittwer, 1998 Integrated amplification and detection

507 of the C677T point mutation in the methylenetetrahydrofolate reductase gene by

508 fluorescence resonance energy transfer and probe melting curves. Anal. Biochem.

509 255: 101–107.

510 Boyle B., N. Dallaire, and J. MacKay, 2009 Evaluation of the impact of single nucleotide

- 511 polymorphisms and primer mismatches on quantitative PCR. *BMC Biotechnol.* 9:  
512 75.
- 513 Brenner S., 1974 The genetics of *Caenorhabditis elegans*. *Genetics* 77: 71–94.
- 514 Bui M., and Z. Liu, 2009 Simple allele-discriminating PCR for cost-effective and rapid  
515 genotyping and mapping. *Plant Methods* 5:1.
- 516 Callegaro A., R. Spinelli, L. Beltrame, S. Bicciato, L. Caristina, *et al.*, 2006 Algorithm for  
517 automatic genotype calling of single nucleotide polymorphisms using the full course  
518 of TaqMan real-time data. *Nucleic Acids Res.* 34: e56.
- 519 Combrinck C. E., R. Y. Seedat, and F. J. Burt, 2013 FRET-based detection and  
520 genotyping of HPV-6 and HPV-11 causing recurrent respiratory papillomatosis. *J.*  
521 *Virol. Methods* 189: 271–276.
- 522 Davis M. W., M. Hammarlund, T. Harrach, P. Hullett, S. Olsen, *et al.*, 2005 Rapid single  
523 nucleotide polymorphism mapping in *C. elegans*. *BMC Genomics* 6: 118.
- 524 Dickinson D. J., and B. Goldstein, 2016 CRISPR-based methods for *Caenorhabditis*  
525 *elegans* genome engineering. *Genetics* 202: 885–901.
- 526 Flibotte S., M. L. Edgley, I. Chaudhry, J. Taylor, S. E. Neil, *et al.*, 2010 Whole-genome  
527 profiling of mutagenesis in *Caenorhabditis elegans*. *Genetics* 185: 431–441.
- 528 Huang M. mei, N. Arnheim, and M. F. Goodman, 1992 Extension of base mispairs by  
529 Taq DNA polymerase: Implications for single nucleotide discrimination in PCR.  
530 *Nucleic Acids Res.* 20: 4567–4573.
- 531 Koch R., H. G. A. M. Van Luenen, M. Van Der Horst, K. L. Thijssen, and R. H. A.

- 532 Plasterk, 2000 Single nucleotide polymorphisms in wild isolates of *Caenorhabditis*  
533 *elegans*. *Genome Res.* 10: 1690–1696.
- 534 Konieczny A., and F. M. Ausubel, 1993 A procedure for mapping *Arabidopsis* mutations  
535 using co-dominant ecotype-specific PCR-based markers. *Plant J.* 4: 403–410.
- 536 Little S., 2001 Amplification-Refractory Mutation System (ARMS) Analysis of Point  
537 Mutations. *Curr Protoc Hum Genet* 9: 9.8.
- 538 Livak K. J., J. Marmaro, and J. A. Todd, 1995 Towards fully automated genome-wide  
539 polymorphism screening. *Nat. Genet.* 9: 341–342.
- 540 Livak K. J., 1999 Allelic discrimination using fluorogenic probes and the 5' nuclease  
541 assay. *Genetic Anal* 14: 143–149.
- 542 Mamotte C. D. S., 2006 Genotyping of single nucleotide substitutions. *Clin. Biochem.*  
543 *Rev.* 27: 63–75.
- 544 Medrano R. F. V., and C. A. De Oliveira, 2014 Guidelines for the tetra-primer ARMS-  
545 PCR technique development. *Mol. Biotechnol.* 56: 599–608.
- 546 Neff M. M., E. Turk, and M. Kalishman, 2002 Web-based primer design for single  
547 nucleotide polymorphism analysis. *Trends Genet.* 18: 613–615.
- 548 Newton C. R., A. Graham, L. E. Heptinstall, S. J. Powell, C. Summers, *et al.*, 1989  
549 Analysis of any point mutation in DNA. The amplification refractory mutation system  
550 (ARMS). *Nucleic Acids Res.* 17: 2503–2516.
- 551 Petruska J., M. F. Goodman, M. S. Boosalis, L. C. Sowers, C. Cheong, *et al.*, 1988  
552 Comparison between DNA melting thermodynamics and DNA polymerase fidelity.



- 553 Proc. Natl. Acad. Sci. U. S. A. 85: 6252–6256.
- 554 Rejali N. A., E. Moric, and C. T. Wittwer, 2018 The effect of single mismatches on  
555 primer extension. Clin. Chem. 64: 801–809.
- 556 Saiki R. K., D. H. Gelfand, S. Stoffel, S. J. Scharf, R. Higuchi, *et al.*, 1988 Primer-  
557 directed enzymatic amplification of DNA with a thermostable DNA polymerase.  
558 Science 239: 487–491.
- 559 Sauer S., 2000 A novel procedure for efficient genotyping of single nucleotide  
560 polymorphisms. Nucleic Acids Res. 28: e13.
- 561 Shastry B. S., 2002 SNP alleles in human disease and evolution. J. Hum. Genet. 47:  
562 561–566.
- 563 Suh Y., and J. Vijg, 2005 SNP discovery in associating genetic variation with human  
564 disease phenotypes. Mutat. Res. - Fundam. Mol. Mech. Mutagen. 573: 41–53.
- 565 Thompson O., M. Edgley, P. Strasbourger, S. Flibotte, B. Ewing, *et al.*, 2013 The million  
566 mutation project: A new approach to genetics in *Caenorhabditis elegans*. Genome  
567 Res. 23: 1749–1762.
- 568 Tindall K. R., and T. A. Kunkel, 1988 Fidelity of DNA Synthesis by the *Thermus*  
569 *aquaticus* DNA Polymerase. Biochemistry 27: 6008–6013.
- 570 Trewick A. L., J. S. El-Sayed Moustafa, A. J. De Smith, P. Froguel, G. Greve, *et al.*,  
571 2011 Accurate single-nucleotide polymorphism allele assignment in trisomic or  
572 duplicated regions by using a single base-extension assay with MALDI-TOF mass  
573 spectrometry. Clin. Chem. 57: 1188–1195.

- 574 Ugozzoli L., and R. B. Wallace, 1991 Allele-specific polymerase chain reaction.  
575       Methods 2: 42–48.
- 576 Vargas D. Y., F. R. Kramer, S. Tyagi, and S. A. E. Marras, 2016 Multiplex real-time  
577       PCR assays that measure the abundance of extremely rare mutations associated  
578       with cancer. PLoS One 11: e0156546.
- 579 Wu D. Y., L. Ugozzoli, B. K. Pal, and R. B. Wallace, 1989 Allele-specific enzymatic  
580       amplification of  $\beta$ -globin genomic DNA for diagnosis of sickle cell anemia. Proc.  
581       Natl. Acad. Sci. U. S. A. 86: 2757–2760.
- 582

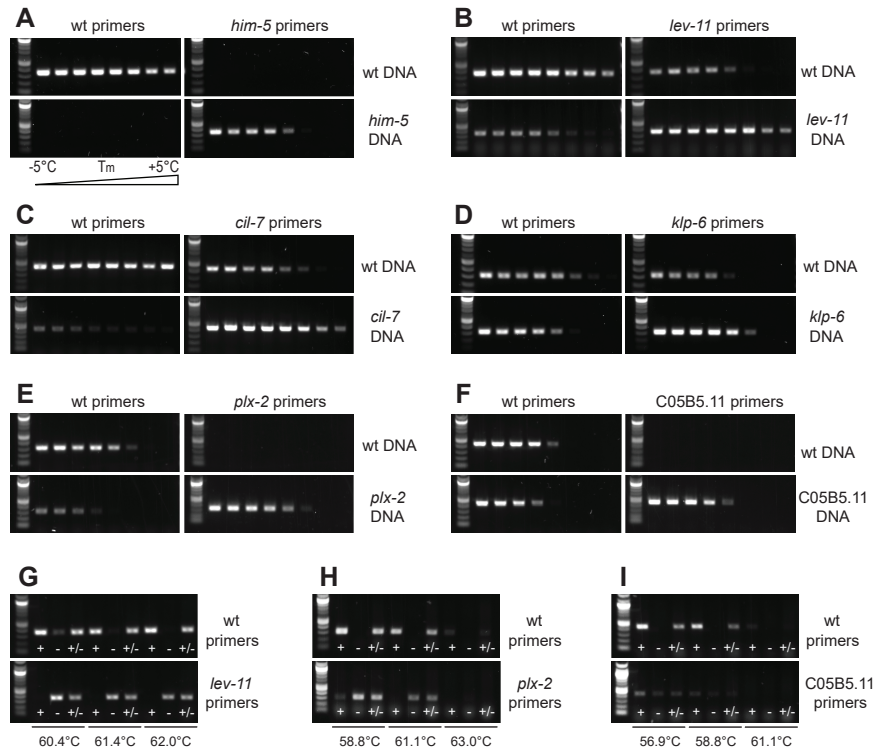

Figure 1

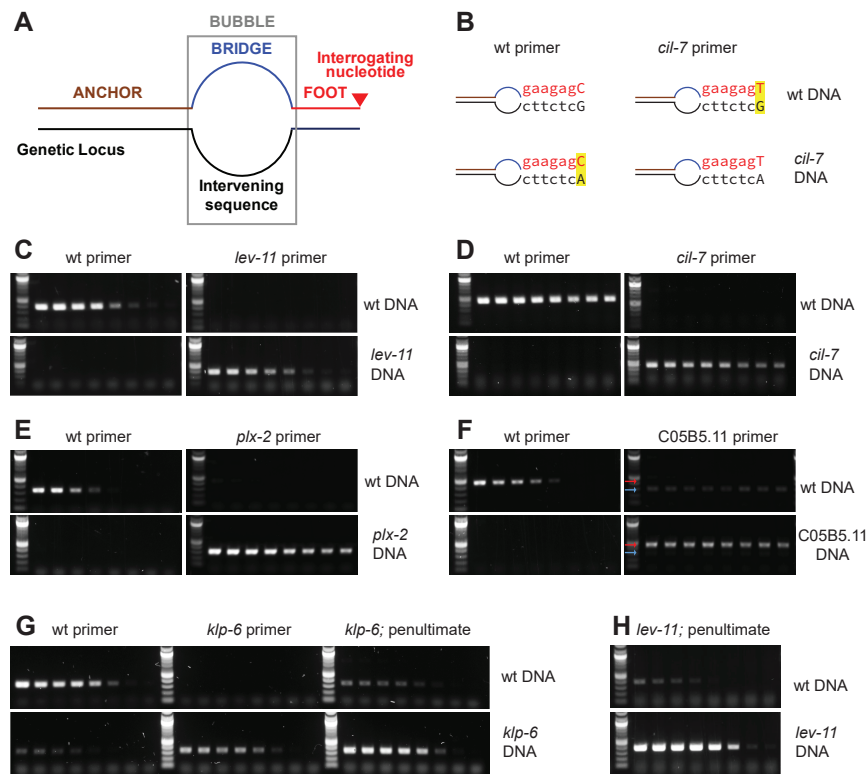

Figure 2

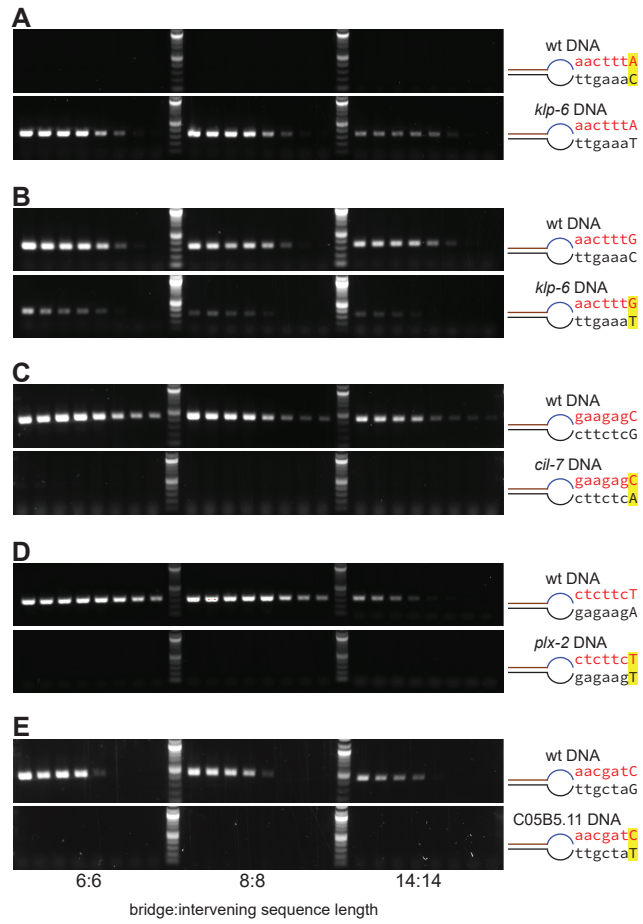

Figure 3

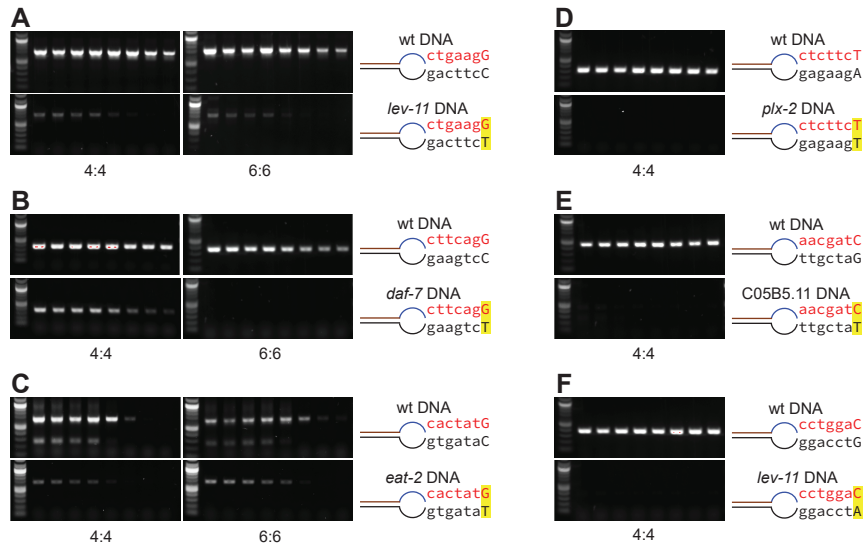

Figure 4

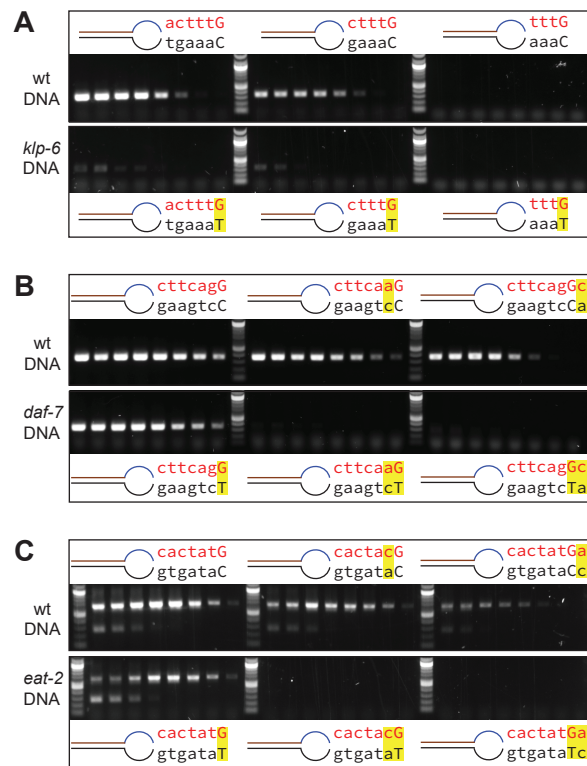

Figure 5

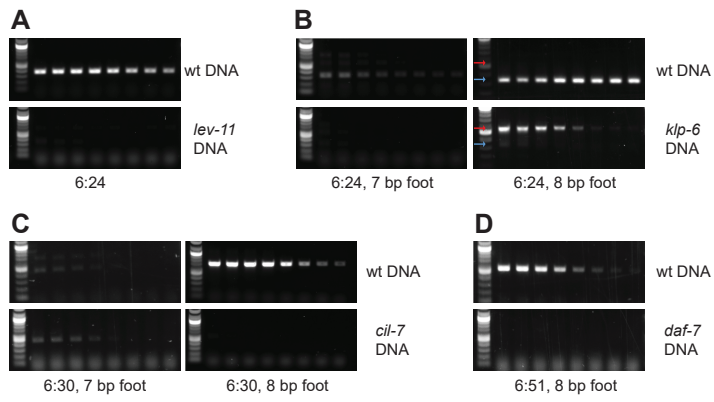

Figure 6



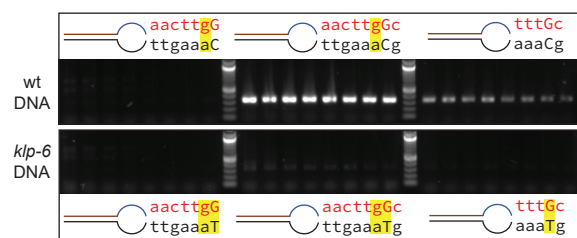

Sup Figure 1

| <i>cil-7</i>                                    | Allele | For / Rev | Figure             | Bubble | Tm (°C) |
|-------------------------------------------------|--------|-----------|--------------------|--------|---------|
| GCTTGGATGGTGAAGAGC                              | wt     | Forward   | Fig. 1C            |        | 57      |
| GCTTGGATGGTGAAGAGT                              | mut    | Forward   | Fig. 1C            |        | 57      |
| CCAGATGACTTATTGGAGCAAGCTGG                      | common | Reverse   | Fig. 1C, 2D, 3C    |        | 61      |
| TCCTCCACCGGATCCG TAGCGAACCTACCA GAAGAGC         | wt     | Forward   | Fig.2D, 3C         | 14::14 | 61      |
| TCCTCCACCGGATCCG TAGCGAACCTACCA GAAGAGT         | mut    | Forward   | Fig. 2D            | 14::14 | 61      |
| CCGGATCCGATCGCTT CTACCA GAAGAGC                 | wt     | Forward   | Fig.3C             | 6::6   | 60      |
| ACCGATCCGATCGCT ACTACCA GAAGAGC                 | wt     | Forward   | Fig.3C             | 8::8   | 60      |
| GAACACAACAAGCAAATGAATAG AACACT TTATGGG          | wt     | Reverse   | Fig.6C             | 6::30  | 60      |
| GAACACAACAAGCAAATGAATAG AACACT TTATGGGC         | wt     | Reverse   | Fig.6C             | 6::30  | 60      |
| GAGATCGTTTCTCTGTTCTC                            | common | Forward   | Fig.6C             |        |         |
| <b>C05B5.11</b>                                 |        |           |                    |        |         |
| AGAACAAGGAGGGAAACGATC                           | wt     | Reverse   | Fig.1F             |        | 58      |
| AGAACAAGGAGGGAAACGATA                           | mut    | Reverse   | Fig.1F             |        | 58      |
| CATGGTGCTCAACTGTG                               | common | Forward   | Fig.1F, 2F, 3E, 4E |        | 54      |
| GTCGATTTGACTTGAAACCCCG TCTGTCTCCCT AACGATC      | wt     | Reverse   | Fig.2F, 3E         | 14::14 | 60      |
| GTCGATTTGACTTGAAACCCCG TCTGTCTCCCT AACGATA      | mut    | Reverse   | Fig.2F             | 14::14 | 60      |
| GACTTGAACCCCGAGAACAAG CTCCCT AACGATC            | wt     | Reverse   | Fig.3E             | 6::6   | 59      |
| TGACTTGAACCCCGAGAACA CTCTCCCT AACGATC           | wt     | Reverse   | Fig.3E             | 8::8   | 60      |
| TTGAACCCCGAGAACAAGGA CTCT AACGATC               | wt     | Reverse   | Fig.4E             | 4::4   | 60      |
| <b>daf-7</b>                                    |        |           |                    |        |         |
| GTCACAAATGATTGGAAAAGCGA ATAA CTCAGG             | wt     | Forward   | Fig.4B, 5B         | 4::4   | 59      |
| GACGTCAAAATGATTGG CTCTAA CTCAGG                 | wt     | Forward   | Fig.4B             | 6::6   | 52      |
| GACGAAGATACCTGGATC                              | common | Reverse   | Fig.4B, 5B         |        | 53      |
| GTCACAAATGATTGGAAAAGCGA ATAA CTCAGG             | wt     | Forward   | Fig.5B             | 4::4   | 59      |
| GTCACAAATGATTGGAAAAGCGA ATAA CTCAGGC            | wt     | Forward   | Fig.5B             | 4::4   | 59      |
| AAATTGACTGTGAGTGTGGCTG TTCGTC ACGATACC          | wt     | Reverse   | Fig.6D             | 6:51   | 60      |
| AGCCATGTTATGGCATCTTCACTC                        | common | Forward   | Fig.6D             |        | 63      |
| <b>eat-2</b>                                    |        |           |                    |        |         |
| TATTACTAGTTGCAAATCCCAT CCAT CACTATG             | wt     | Forward   | Fig.4C, 5C         | 4::4   | 57      |
| GTAATATTACTAGTTGCAAATCCCAT TACCAT CACTATG       | wt     | Forward   | Fig.4C             | 6::6   | 56      |
| GTAGCTGCATATAGAGGTACTG                          | common | Reverse   | Fig.4C, 5C         |        | 57      |
| TATTACTAGTTGCAAATCCCAT CCAT CACTACG             | wt     | Forward   | Fig.5C             | 4::4   | 57      |
| TATTACTAGTTGCAAATCCCAT CCAT CACTATGA            | wt     | Forward   | Fig.5C             | 4::4   | 57      |
| <b>him-5</b>                                    |        |           |                    |        |         |
| CTTCCGGAGCTTTGCC                                | wt     | Reverse   | Fig.1A             |        | 58      |
| CTTCCGGAGCTTTGCT                                | mut    | Reverse   | Fig.1A             |        | 58      |
| GTCTTCACAGAACAGAAATACATCG                       | common | Forward   | Fig.1A             |        | 59      |
| <b>klp-6</b>                                    |        |           |                    |        |         |
| CATCAATCAAATACGCCAAACTTTG                       | wt     | Reverse   | Fig.1A             |        | 56      |
| CATCAATCAAATACGCCAAACTTTA                       | mut    | Reverse   | Fig.1A             |        | 56      |
| GCATGGTAGGACAGGTTG                              | common | Forward   | Figs. 1-3, 5, 6    |        | 60      |
| GATTGGAAACTGTTCTCCACATC TTAGTTTATGCGGT AACTTTG  | wt     | Reverse   | Fig.2G, 3B         | 14::14 | 59      |
| GATTGGAAACTGTTCTCCACATC TTAGTTTATGCGGT AACTTTA  | mut    | Reverse   | Fig.2G, 3A         | 14::14 | 59      |
| GATTGGAAACTGTTCTCCACATC TTAGTTTATGCGGT AACTTTAC | mut    | Reverse   | Fig.2G             | 14::14 | 59      |
| GAAACTGTTCTCCACATCAAAT TGCGGT AACTTTG           | wt     | Reverse   | Fig.3B             | 6::6   | 56      |
| GAAACTGTTCTCCACATCAATCAA TATGCGGT AACTTTG       | wt     | Reverse   | Fig.3B             | 8::8   | 58      |
| GAAACTGTTCTCCACATCAAAT TGCGGT AACTTTA           | mut    | Reverse   | Fig.3A             | 6::6   | 56      |
| GAAACTGTTCTCCACATCAATCAA TATGCGGT AACTTTA       | mut    | Reverse   | Fig.3A             | 8::8   | 58      |
| GAAACTGTTCTCCACATCAATCAAAT GCGGT ACTTTG         | wt     | Reverse   | Fig. 5A            | 6::6   | 58      |
| AAACTGTTCTCCACATCAATCAAAT CCGTIT CTTTG          | wt     | reverse   | Fig.5A             | 6::6   | 58      |
| TGTTCTCCACATCAATCAAATCG GGTITG TTTG             | wt     | Reverse   | Fig.5A             | 6::6   | 58      |
| CCTGATAATCAACGATTGAAACTGTT AAGGTT AACTTTG       | wt     | Reverse   | Fig.6B             | 6:24   | 58      |
| CCTGATAATCAACGATTGAAACTGTT AAGGTT AACTTTGC      | wt     | Reverse   | Fig.6B             | 6:24   | 58      |
| <b>lev-11</b>                                   |        |           |                    |        |         |
| TACACAGAAAAGAAATCGGACCTC                        | wt     | Forward   | Fig.1B             |        | 57      |
| TACACAGAAAAGAAATCGGACCTT                        | mut    | Forward   | Fig.1B             |        | 57      |
| CTGTTACATCAGCTGCAGC                             | common | Reverse   | Fig.1B, 2C, 4F, 6A |        | 57      |
| GATAGTGAAGACACAGAAAGACTACTA GTGTCTCTCTTAG GGAC  | wt     | Forward   | Fig.2C             | 14::14 | 56      |
| GATAGTGAAGACACAGAAAGACTACTA GTGTCTCTCTTAG GGAC  | mut    | Forward   | Fig.2C             | 14::14 | 56      |
| ATCCGCACCGTCTCATC GTCT CTGAAGG                  | wt     | Reverse   | Fig.4A             | 4::4   | 59      |
| AGATCCGCACCGTCTCA AGGTCT CTGAAGG                | wt     | Reverse   | Fig.4A             | 6::6   | 60      |
| CATCTCACAGCAAGTG                                | common | Forward   | Fig.4A             |        | 54      |
| AAGACACAGAAAGACTACTACACAGAAAAG TTAG GGACCTC     | wt     | Forward   | Fig.4F             | 4::4   | 59      |
| TCACITTTGATAGTGAAGACACAGA TTCTAGG GGACCTC       | wt     | Forward   | Fig.6A             | 6:24   | 56      |
| <b>plx-2</b>                                    |        |           |                    |        |         |
| TGCCGTGTACTCACTCTTCT                            | wt     | Forward   | Fig.1E             |        | 58      |
| TGCCGTGTACTCACTCTTCA                            | mut    | Forward   | Fig.1E             |        | 58      |
| GTAGTTGTTATGTTGATAC                             | common | Reverse   | Fig.1E, 2E, 3D, 4D |        | 54      |
| CCATGTGAAAACCCACAGGTTG GGCACATATGAGTT CTCTTCT   | wt     | Forward   | Fig.2E, 3D         | 14::14 | 60      |
| CCATGTGAAAACCCACAGGTTG GGCACATATGAGTT CTCTTCA   | mut    | Forward   | Fig. 2E            | 14::14 | 60      |
| CCCACAGGTTGCCGTGTAT TGAAGT CTCTTCT              | wt     | Forward   | Fig.3D             | 6::6   | 62      |
| CCCACAGGTTGCCGTGT TATGAGT CTCTTCT               | wt     | Forward   | Fig.3D             | 8::8   | 62      |
| CCCACAGGTTGCCGTGTATAGT CTCTTCT                  | ww     | Forward   | Fig.4D             | 4::4   | 60      |

Supplementary Table 1: For SS primers, the 5' anchor sequence (brown), bridge sequence (blue), and 3' foot sequence (red) are indicated
